# Supplementary material for: A Molecular Phylogenetic Study of the Genus Phedimus for Tracing the Origin of “Tottori Fujita” Cultivars
Source: MDPI journal article supplement (doi:10.3390/plants9020254), 2020-02-17
Supplement: s1 [file s1]

**Supplementary Figure S1.** Three types based on nucleotide substitution in *psbA-trnH* sequences of *Phedimus* investigated in the present study including cultivar “Tottori Fujita 1gou” and “Tottori Fujita 2gou”.
